# Supplementary material for: Molybdenum-encapsulation modified the optical property of single walled carbon nanotubes
Source: Royal Society of Chemistry journal article supplement (doi:10.1039/c4ra07745h), 2014-10-28
Supplement: c4ra07745h1.pdf [file c4ra07745h1.pdf]

## Supporting Information

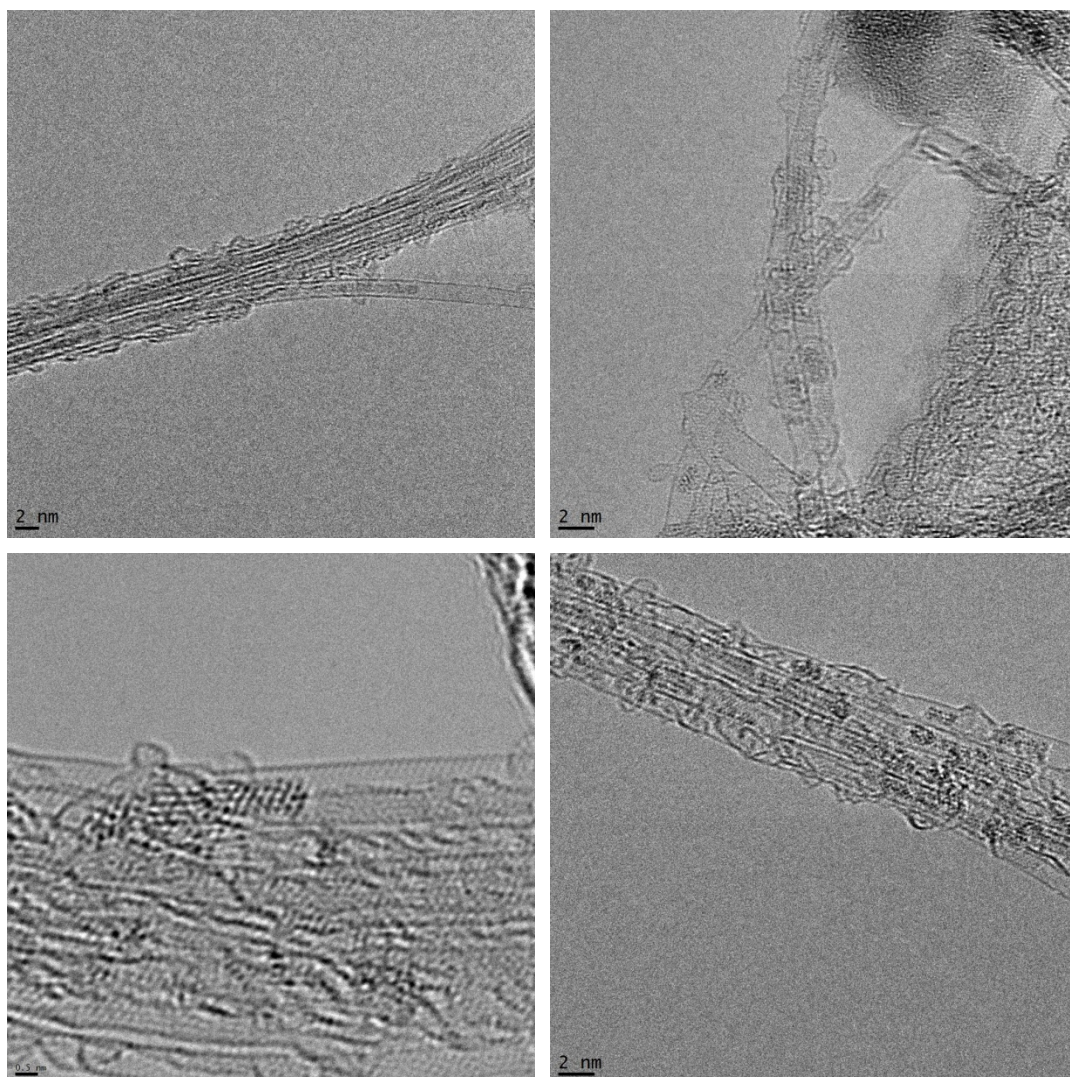

**Figure S1.** High resolution transmission electron microscopic images of Mo-encapsulated single walled carbon nanotubes.

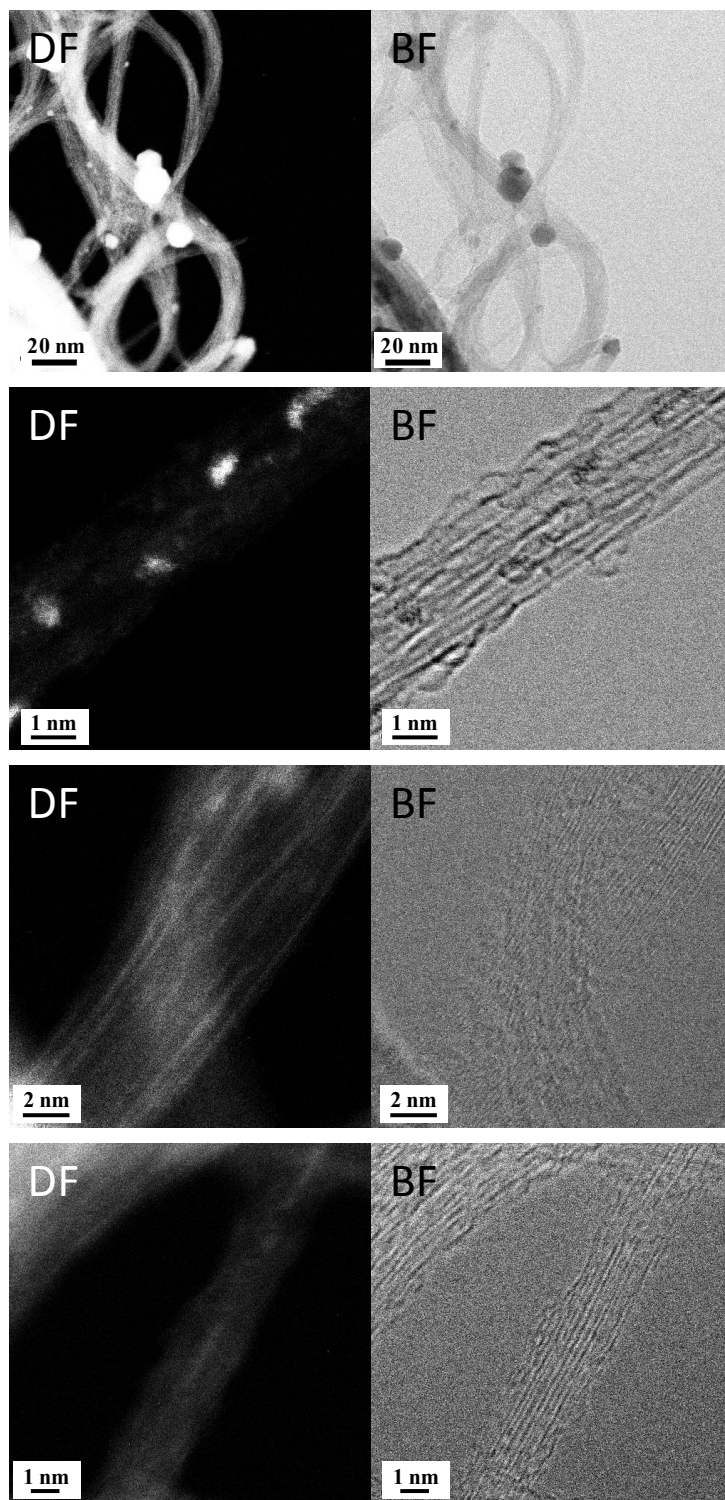

**Figure S2.** High-angle annular dark field and bright field images of Mo-encapsulated single walled carbon nanotubes.
